# Supplementary material for: Parallel analysis of global garlic gene expression and alliin content following leaf wounding
Source: BMC Plant Biol. 2021 Apr 10;21:174. doi: 10.1186/s12870-021-02948-0 (PMC8035738; doi:10.1186/s12870-021-02948-0)
Supplement: Supplementary file 1 — Additional file 1: Table S1. Clean reads obtained from each sample group. [file 12870_2021_2948_MOESM1_ESM.xlsx]

## Sheet: Sheet1
Table S1 The information of clean reads from different sample groups
#SampleID	ReadSum	BaseSum	GC(%)	N(%)	Q20(%)	CycleQ20(%)	Q30(%)	Mean
T01	33738827	10091729684	44.48	0.01	98.27	100	95.71	34855947
T02	34803391	10429116984	45.17	0.01	98.21	100	95.48
T03	36025623	10786224366	44.53	0.01	98.2	100	95.6
T04	29425445	8787847674	44.83	0.01	97.91	100	94.73	3.08305e+07
T05	35057630	10503862484	44.92	0.01	98.26	100	95.74
T06	28008555	8376161452	45.09	0.01	98.25	100	95.72
T07	23529385	7029947102	46.66	0.01	98.35	100	95.88	29001419
T08	33111197	9912044522	45.34	0.01	98.41	100	96.01
T09	30363675	9061233124	45.96	0.01	98.42	100	96.03
T10	34057521	10162688626	45.44	0.01	98.42	100	96.01	3.42789e+07
T11	35477458	10597301802	44.99	0.01	98.25	100	95.66
T12	33301788	9966450018	45.02	0.01	98.26	100	95.68
Mark: Read Number：The total number of pair-end Reads in Clean Data；Base Number：The total number of bases of Clean Data；GC Content：The content of GC in Clean Data；%≥Q30：The percentage of Clean Data bases which quality is ≥ 30.
