# Supplementary material for: Parallel analysis of global garlic gene expression and alliin content following leaf wounding
Source: BMC Plant Biol. 2021 Apr 10;21:174. doi: 10.1186/s12870-021-02948-0 (PMC8035738; doi:10.1186/s12870-021-02948-0)
Supplement: Supplementary file 6 — Additional file 6: Table S3. Comparisons of cysteine pathway-related unigenes between T 1/3 vs. T 4/6, T 1/3 vs. T 7/9, and T 1/3 vs. T10/12. [file 12870_2021_2948_MOESM6_ESM.xlsx]

## Sheet: Sheet1
Compared with differential genes related to cysteine pathway in different samples
ID	T1-3/T4-6	T1-3/T7-9	T1-3/T10-12
c102143.graph_c0	6.40344	5.38462	1.27473
c107464.graph_c0	0.806679	0.538363	0.46859
c107612.graph_c1	69.3421	83.4666	0.550656
c107901.graph_c0	0.712917	0.634121	0.413852
c109017.graph_c1	18.8789	9.68691	0.82673
c109602.graph_c0	0.840843	0.612238	0.465641
c110320.graph_c0	0.818943	0.635463	0.457933
c110750.graph_c0	0.76575	0.543025	0.353704
c111121.graph_c0	19.8221	21.7662	1.22735
c111539.graph_c0	0.613744	0.425453	0.222033
c113055.graph_c0	0.28063	0.339168	1.63564
c114448.graph_c0	0.698409	0.419115	0.220992
c114534.graph_c0	2.13873	2.17326	4.65314
c115214.graph_c0	0.718864	0.655281	0.499982
c116925.graph_c0	0.614713	0.476605	0.234399
c117523.graph_c0	0.876103	0.728247	0.517581
c119009.graph_c0	0.443047	0.360228	0.235285
c119302.graph_c0	0.662677	0.485569	0.327329
c119477.graph_c0	2.62433	2.58523	1.0854
c120474.graph_c0	1.97046	2.30647	1.98021
c120534.graph_c0	0.894949	0.622246	0.438129
c121815.graph_c0	0.591923	0.660776	0.358926
c122463.graph_c0	1.17647	2.97518	72.5318
c123463.graph_c1	2.70886	1.93001	1.33638
c127096.graph_c0	0.75419	0.52456	0.316814
c127655.graph_c2	0.850594	0.633796	0.531793
c127915.graph_c1	0.735446	0.539512	0.44893
c127971.graph_c0	0.867743	0.64139	0.50874
c128213.graph_c0	0.952344	0.645649	0.346228
c128508.graph_c0	0.37968	2.08809	0.290623
c129383.graph_c1	1.41419	2.18539	2.00798
c129587.graph_c1	2.01307	2.10967	1.80537
c130650.graph_c1	0.754514	0.64954	0.504221
c131567.graph_c1	0.364299	0.507524	1.05513
c132137.graph_c0	3.55095	3.63523	0.69831
c132615.graph_c0	5.05634	1.93021	10.0312
c132698.graph_c0	13.0583	11.5708	0.500476
c132806.graph_c0	15.3307	17.6816	1.47443
c132898.graph_c0	14.0279	14.5898	0.517798
c133557.graph_c0	6.38335	6.93176	0.92785
c133948.graph_c0	4.81361	5.7106	1.32525
c134076.graph_c0	6.10807	7.17213	0.562831
c50229.graph_c0	0.879701	0.637178	0.496681
c54046.graph_c0	0.975809	0.698491	0.524823
c57320.graph_c0	0.563682	0.542126	0.438378
c71926.graph_c0	3.73174	3.81276	0.844188
c94056.graph_c0	1.04861	2.78831	1.8965
c95022.graph_c0	61.0834	57.1759	0.295924
c96793.graph_c0	8.31324	10.5986	0.908453
c99077.graph_c0	1.80372	1.67187	5.18231
