# Supplementary material for: Parallel analysis of global garlic gene expression and alliin content following leaf wounding
Source: BMC Plant Biol. 2021 Apr 10;21:174. doi: 10.1186/s12870-021-02948-0 (PMC8035738; doi:10.1186/s12870-021-02948-0)
Supplement: Supplementary file 9 — Additional file 9: Table S6. Sulfur-related GO terms. [file 12870_2021_2948_MOESM9_ESM.xlsx]

## Sheet: Sheet1
Table S5 The value of sulfuer GO terms
GO term	T1/3-T4/6	T1/3-T7/9	T1/3-T10/12
GO:0016877	0.02281	0.02219	0.05791
GO:1901682	0.13427	0.13008	0.03515
GO:0006790	0.6831	0.32263	0.15463
GO:0008272	0.08853	0.08588	0.0222
GO:0015116	0.13427	0.13008	0.03515
