# Supplementary material for: Parallel analysis of global garlic gene expression and alliin content following leaf wounding
Source: BMC Plant Biol. 2021 Apr 10;21:174. doi: 10.1186/s12870-021-02948-0 (PMC8035738; doi:10.1186/s12870-021-02948-0)
Supplement: Supplementary file 11 — Additional file 11: Table S8. The eight candidate TFs involved in regulation of alliin synthesis in garlic. [file 12870_2021_2948_MOESM11_ESM.xlsx]

## Sheet: Sheet1
Table S6 Eight candidates TFs of regulated alliin synthesis in garlic
	#ID	Subject_id	%identity	alignment_length	mismatches	gap_openings	q.start	q.end	s.start	s.end	e-value	bit_score	family	T01_count	T01_FPKM	T02_count	T02_FPKM	T03_count	T03_FPKM	T04_count	T04_FPKM	T05_count	T05_FPKM	T06_count	T06_FPKM	T07_count	T07_FPKM	T08_count	T08_FPKM	T09_count	T09_FPKM	T10_count	T10_FPKM	T11_count	T11_FPKM	T12_count	T12_FPKM	T01_T02_T03_vs_T04_T05_T06			T01_T02_T03_vs_T07_T08_T09			T01_T02_T03_vs_T10_T11_T12			COG_class	COG_class_annotation	GO_annotation
1	c128558.graph_c0	GSVIVT01018226001_ERF	75.97	258	60	1	2389	3156	118	375	1e-123	395	ERF	5871	263.772	6236	260.356	6834	293.145	23593	1263.95	25940	1094.06	15774	1005.78	7570	549.723	10068	495.827	7647	437.885	9393	477.715	8920	460.622	10635	507.61	2.52741e-15	2.03926	up	--	--	--	--	--	--	[O]	Posttranslational modification, protein turnover, chaperones	Molecular Function: ATP binding (GO:0005524);; Biological Process: protein folding (GO:0006457);; Biological Process: response to heat (GO:0009408);; Cellular Component: membrane (GO:0016020);; Molecular Function: heat shock protein binding (GO:0031072);; Molecular Function: metal ion binding (GO:0046872);; Molecular Function: unfolded protein binding (GO:0051082);;
2	c108094.graph_c0	GSMUA_Achr10P03230_001_AP2	92.59	135	10	0	611	1015	132	266	1e-86	238	AP2	247	5.31079	184	3.67642	252	5.17314	588	15.0754	523	10.5565	377	11.504	456	15.8474	703	16.5687	502	13.7568	466	11.3422	286	7.06791	445	10.1648	7.00429e-08	1.39331	up	4.40387e-11	1.68105	up	--	--	--	--	--	Molecular Function: DNA binding (GO:0003677);; Molecular Function: sequence-specific DNA binding transcription factor activity (GO:0003700);; Cellular Component: nucleus (GO:0005634);; Biological Process: regulation of transcription, DNA-templated (GO:0006355);;
3	c94643.graph_c0	GSVIVT01018226001_ERF	73.99	173	43	1	5	517	238	410	6e-87	273	ERF	2996	199.374	3248	200.857	3144	199.756	6263	496.981	6491	405.503	4637	437.935	3941	423.9	5088	371.145	3947	334.769	4676	352.248	4732	361.938	5081	359.212	4.27677e-07	1.15419	up	--	--	--	--	--	--	[O]	Posttranslational modification, protein turnover, chaperones	Molecular Function: ATP binding (GO:0005524);; Cellular Component: cell wall (GO:0005618);; Cellular Component: nucleolus (GO:0005730);; Cellular Component: plasma membrane (GO:0005886);; Biological Process: protein folding (GO:0006457);; Biological Process: response to heat (GO:0009408);; Biological Process: response to salt stress (GO:0009651);; Molecular Function: heat shock protein binding (G…
4	c128795.graph_c0	Ghi001371_MYB_related	73.61	216	55	3	939	298	8	222	1e-101	327	related	4761	129.941	4093	103.809	4918	128.153	7739	251.863	9357	239.74	6341	245.613	6015	265.347	11036	330.164	8393	291.956	10415	321.777	7516	235.775	14869	431.127	1.95875e-05	1.02807	up	6.34925e-05	1.25855	up	--	--	--	[KL]	--	Molecular Function: DNA binding (GO:0003677);; Molecular Function: helicase activity (GO:0004386);; Molecular Function: ATP binding (GO:0005524);; Cellular Component: nucleus (GO:0005634);; Biological Process: embryo sac development (GO:0009553);; Biological Process: cell growth (GO:0016049);; Molecular Function: transferase activity (GO:0016740);; Molecular Function: nucleosome binding (GO:00314…
5	c120391.graph_c0	OpuncBB_FGP22587_MYB_related	70.7	355	78	4	1193	2179	455	806	1e-160	489	related	412	8.35817	438	8.2572	491	9.51012	161	3.89466	289	5.50386	73	2.10176	116	3.80366	177	3.93601	118	3.05104	188	4.31737	189	4.40695	152	3.27591	0.00032662	-1.17303	down	2.98008e-06	-1.30555	down	0.00177837	-1.33513	down	[RTKL]	--	Molecular Function: protein tyrosine kinase activity (GO:0004713);; Molecular Function: ATP binding (GO:0005524);; Biological Process: protein phosphorylation (GO:0006468);;
6	c54016.graph_c0	MDP0000253370_MYB_related	76.35	241	56	1	418	1137	50	290	3e-128	384	related	77	2.46286	66	1.96172	84	2.56519	119	4.53864	143	4.29379	135	6.12813	73	3.774	160	5.60968	101	4.11739	78	2.82417	132	4.85272	134	4.55333	0.000456567	1.09603	up	--	--	--	--	--	--	--	--	Molecular Function: procollagen-proline 4-dioxygenase activity (GO:0004656);; Molecular Function: iron ion binding (GO:0005506);; Cellular Component: Golgi apparatus (GO:0005794);; Cellular Component: plasma membrane (GO:0005886);; Molecular Function: L-ascorbic acid binding (GO:0031418);; Biological Process: oxidation-reduction process (GO:0055114);;
7	c93110.graph_c0	Potri.018G029500.1_bZIP	72.73	143	38	1	164	589	25	167	6e-65	202	bZIP	60	3.1875	34	1.6785	53	2.68822	115	7.28495	86	4.28897	67	5.05148	85	7.29874	196	11.4136	52	3.5209	21	1.26289	32	1.95394	64	3.61205	0.00697316	1.1436	up	--	--	--	--	--	--	--	--	Molecular Function: double-stranded DNA binding (GO:0003690);; Molecular Function: sequence-specific DNA binding transcription factor activity (GO:0003700);; Cellular Component: nucleus (GO:0005634);; Biological Process: regulation of transcription, DNA-templated (GO:0006355);; Biological Process: response to abscisic acid (GO:0009737);; Biological Process: gibberellic acid mediated signaling pat…
8	c101570.graph_c0	Si006975m_NAC	75.48	155	35	1	317	772	3	157	2e-79	251	NAC	1285	42.1148	1617	49.2478	1864	58.3269	291	11.3725	251	7.72256	121	5.62811	406	21.5074	490	17.6034	1083	45.2389	738	27.3801	906	34.1289	1073	37.36	8.00742e-19	-2.60164	down	--	--	--	--	--	--	--	--	Molecular Function: DNA binding (GO:0003677);; Biological Process: regulation of transcription, DNA-templated (GO:0006355);;
[truncated: 6 more columns]
